# Supplementary material for: Impact of Protein Intake on eGFR Slope One Year Post Kidney Transplantation: A Single- center Retrospective Study
Source: Research Square preprint supplement (doi:10.21203/rs.3.rs-7148397/v1), 2025-07-27
Supplement: Supplementary file 1 [file 2c063c8e777750b0437e904c.docx]

|  | Protein intake (g/day) | | |  | Protein intake (g/kg IBW) | | |
| --- | --- | --- | --- | --- | --- | --- | --- |
|  | Low protein intake  group | Middle protein intake group | High protein intake group |  | Low protein intake  group | Middle protein intake group | High protein intake group |
| 3 months after transplantation | 41.9 (±9.36) | 58.6 (±11.6) | 70.4 (±24.3) |  | 0.72 (±0.15) | 0.98 (±0.14) | 1.19 (±0.27) |
| 6 months after transplantation | 45.9 (±9.57) | 63.5 (±12.5) | 71.6 (±12.6) |  | 0.81 (±0.17) | 1.06 (±0.17) | 1.24 (±0.13) |
| 9 months after transplantation | 44.3 (±11.1) | 64.2 (±13.5) | 89.9 (±13.8) |  | 0.77 (±0.17) | 1.08 (±0.17) | 1.54 (±0.25) |
| 12 months after transplantation | 44.3 (±12.4) | 64.1 (±14.2) | 73.8 (±14.3) |  | 0.76 (±0.17) | 1.07 (±0.17) | 1.26 (±0.20) |

Supplementary table1

Abbreviations: IBW ideal body weight
